# Supplementary material for: The effect of age on the attachment ability of stick insects (Phasmatodea)
Source: Beilstein J Nanotechnol. 2024 Jul 15;15:867–83. doi: 10.3762/bjnano.15.72 (PMC11285055; doi:10.3762/bjnano.15.72)
Supplement: File 1 — Raw experimental data. [file Beilstein_J_Nanotechnol-15-867-s001.xlsx]

## Sheet: attachment
age	mass	°1	°2	°3	°Mean	HGlas1	HGlas2	HGlas3	HGlasMean	H1µm1	H1µm2	H1µm3	H1µmMean	H12µm1	H12µm2	H12µm3	H12µmMean	RGlas1	RGlas2	RGlas3	RGlasMean	R1µm1	R1µm2	R1µm3	R1µmMean	R12µm1	R12µm2	R12µm3	R12µmMean
old	2.88	60	70	80	70	29.77	27.28	29.77	28.94	29.15	28.53	29.15	28.9433	27.28	26.66	19.84	24.5933	19.13	25.62	20.75	21.8333	17.5	13.17	13.72	14.7967	15.34	13.72	14.26	14.44
old	3.94	100	60	70	76.6667	33.75	28.62	26.91	29.76	19.49	26.34	22.34	22.7233	34.89	33.75	31.47	33.37	35.46	40.02	59.42	44.9667	5.22	6.37	4.66	5.41667	6.94	7.51	8.08	7.51
old	3.54	60	55	80	65	28.53	35.36	34.74	32.8767	27.91	26.66	34.74	29.77	32.88	26.05	31.01	29.98	46.53	48.4	27.29	40.74	7.42	9.29	3.7	6.80333	8.66	6.18	4.94	6.59333
old	3.55	180	180	180	180	60.81	80.68	69.5	70.33	43.43	34.74	35.98	38.05	48.4	37.22	32.88	39.5	37.84	42.81	58.95	46.5333	3.08	6.18	9.29	6.18333	9.91	3.7	79.44	31.0167
old	2.8	55	75	50	60	50.26	56.47	77.57	61.4333	48.4	53.98	41.57	47.9833	29.15	31.01	38.46	32.8733	72.61	68.88	46.53	62.6733	21.7	8.67	5.56	11.9767	31.63	36.6	15.7	27.9767
old	4.34	170	140	120	143.333	91.32	72.32	65.29	76.31	32.22	23.07	31.51	28.9333	35.03	30.81	34.33	33.39	60.06	34.85	19.02	37.9767	5.54	NA	20.2	12.87	27.23	6.71	16.1	16.68
old	2.8	180	180	180	180	35.03	30.1	30.81	31.98	24.48	28.7	20.96	24.7133	32.92	20.25	33.62	28.93	37.2	55.37	57.72	50.0967	16.1	16.68	16.09	16.29	22.54	22.54	21.37	22.15
old	4.32	80	70	70	73.3333	96.3	91.02	57.6	81.64	49.39	23	37.66	36.6833	27.11	17.73	31.8	25.5467	46.46	32.97	66.39	48.6067	47.04	18.9	38.83	34.9233	28.28	33.56	37.66	33.1667
old	4.32	180	180	180	180	33.76	25.99	24.88	28.21	12.66	24.32	24.88	20.62	22.65	23.21	32.65	26.17	20.84	24.68	27.08	24.2	14.71	16.6	18.44	16.5833	19.4	18.44	18.92	18.92
old	3.64	120	80	60	86.6667	69.31	86.53	81.53	79.1233	40.98	45.98	45.98	44.3133	42.65	34.87	30.99	36.17	67.64	62.65	52.65	60.98	40.2	31.39	39.07	36.8867	28.52	23.7	47.22	33.1467
old	2.43	180	180	180	180	62.65	59.89	52.1	58.2133	42.65	35.43	31.15	36.41	33.76	34.32	33.21	33.7633	40.03	42.43	33.31	38.59	39.55	36.67	33.31	36.51	26.6	40.99	24.2	30.5967
old	3.98	180	175	180	178.333	83.89	40.46	96.74	73.6967	46.97	42.29	56.02	48.4267	32.02	40.46	41.87	38.1167	61.23	61.45	69.89	64.19	46.37	57.83	64.46	56.22	30.09	32.5	31.29	31.2933
old	4.17	180	180	180	180	34.13	31.32	32.72	32.7233	36.24	35.54	26.39	32.7233	27.09	35.54	34.83	32.4867	22.38	18.86	17.1	19.4467	20.03	22.38	20.62	21.01	23.55	24.14	17.1	21.5967
old	4.2	70	70	80	73.3333	27.3	31.67	30.94	29.97	33.85	34.58	38.95	35.7933	36.76	35.31	32.4	34.8233	32.07	36.29	33.88	34.08	27.24	25.43	26.04	26.2367	22.41	23.62	24.23	23.42
old	4.26	50	60	60	56.6667	40.4	44.04	36.76	40.4	35.31	36.03	34.58	35.3067	35.31	37.49	38.95	37.25	deceased	deceased	deceased	deceased	deceased	deceased	deceased	deceased	deceased	deceased	deceased	deceased
young	4.85	180	180	180	180	147.11	141.66	155.96	148.243	100.13	81.06	69.5	83.5633	70.17	76.3	67.45	71.3067	186.59	53.15	141.66	127.133	53.15	52.47	63.36	56.3267	67.45	42.94	68.81	59.7333
young	5.68	180	180	180	180	94.68	95.36	96.72	95.5867	74.94	76.3	67.45	72.8967	56.55	47.7	49.06	51.1033	81.75	34.09	80.38	65.4067	51.11	76.98	85.83	71.3067	49.75	37.49	35.45	40.8967
young	4.68	180	180	180	180	123.8	125.91	61.88	103.863	78.77	77.36	77.36	77.83	48.52	48.52	44.3	47.1133	110.6	112.32	59.84	94.2533	26.2	95.07	90.63	70.6333	45	61.55	26.75	44.4333
young	5.07	180	180	180	180	107.29	91.36	90.04	96.23	66.3	73.55	72.23	70.6933	49.8	48.49	49.15	49.1467	84.52	90.07	87.3	87.2967	71.75	61.75	55.08	62.86	69.52	50.64	61.75	60.6367
young	5.07	180	180	180	180	125.56	102.27	95.72	107.85	79.71	75.34	89.9	81.65	57.87	59.33	54.23	57.1433	72.47	103.22	137.59	104.427	89.35	75.48	91.16	85.33	58.6	60.41	93.57	70.86
young	4.9	180	180	180	180	93.43	147.44	136.89	125.92	78.96	63.64	71.08	71.2267	50.6	52.46	77.91	60.3233	91.77	94.11	116.84	100.907	82.74	87.07	63.8	77.87	61.01	118.33	38.89	72.7433
young	4.48	180	180	180	180	142.47	148.06	130.68	140.403	89.09	69.84	71.71	76.88	65.5	44.39	49.36	53.0833	134.11	122.51	152.58	136.4	80.3	79.24	63.41	74.3167	89.26	89.79	73.96	84.3367
young	4.92	180	180	180	180	161.48	153.64	131.33	148.817	84.9	75.85	76.46	79.07	52.94	46.31	48.72	49.3233	162.08	147.31	113.01	140.8	81.35	98.23	92.43	90.67	54.97	61.83	89.79	68.8633
young	5.1	180	180	175	178.333	104.99	137.35	147.91	130.083	77.55	53.63	62.08	64.42	50.82	54.34	48.01	51.0567	93.74	99.61	99.02	97.4567	93.74	87.88	96.09	92.57	60.91	66.19	62.67	63.2567
young	3.94	180	180	180	180	101.98	113.24	117.46	110.893	51.33	42.18	47.11	46.8733	56.96	40.07	37.26	44.7633	186.54	165.44	175.08	175.687	89.45	90.26	94.28	91.33	57.49	62.32	56.29	58.7
young	5.1	180	180	180	180	165.3	193.44	167.41	175.383	80.88	82.28	99.17	87.4433	77.36	81.58	57.66	72.2	157.49	161	156.9	158.463	98.27	94.17	95.47	95.97	64.57	89.48	87.13	80.3933
young	6.04	180	180	180	180	128.84	102.29	107.05	112.727	62.12	71.65	73.69	69.1533	47.24	64.73	42.42	51.4633	119.61	128.65	114.18	120.813	90.66	96.69	75.58	87.6433	59.91	67.14	42.42	56.49
young	5.36	180	180	180	180	112.5	142.46	127.48	127.48	94.12	99.56	113.86	102.513	73.69	60.75	63.48	65.9733	147.68	108.89	124.29	126.953	69.53	110.03	94.06	91.2067	96.91	88.93	71.24	85.6933
young	5.65	180	180	180	180	129.81	119.96	155.84	135.203	108.7	60.86	100.97	90.1767	47.5	53.13	42.57	47.7333	231.79	202.1	175.43	203.107	132.01	112.11	105.72	116.613	98.24	100.87	80.14	93.0833
young	5.4	180	180	180	180	111.52	99.56	110.11	107.063	55.94	56.64	60.86	57.8133	53.13	51.01	48.9	51.0133	98.83	83.16	104.86	95.6167	74.71	75.92	62.65	71.0933	66.87	80.14	37.93	61.6467

## Sheet: weekly measurements
week	°Mean	HGlasMean	H1Mean	H12Mean	RGlasMean	R1Mean	R12Mean	mass
1	180	127.48	102.513	65.9733	126.953	91.2067	85.6933	5.37
1	180	135.203	90.1767	47.7333	203.107	116.613	93.0833	5.66
1	180	107.063	57.8133	51.0133	95.6167	71.0933	61.6467	5.41
1	180	79.6267	60.3867	50.78	81.95	65.0633	38.9333	5.22
2	180	129.143	63.0133	55.7433	120.907	91.0067	73.03	4.94
2	180	160.897	102.027	55.36	99.67	103.387	110.813	5.49
2	170	115.547	69.3433	53.6367	205.01	120.383	96.8633	5.71
2	133	62.78	46.8333	46.8333	61.0767	19.27	25.5	5.01
2	180	133.137	56.6833	47.0667	197.563	90.2267	53.64	4.03
3	180	85.1867	53.87	35.7133	109.147	94.8833	46.42	4.98
3	176	63.6767	49.8433	50.3133	61.8567	53.6467	47.5867	5.27
3	173	92.0533	59.4567	43.7467	193.91	109.687	37.5233	5.58
3	103	29.3233	37.2633	39.7567	27.6033	18.48	20.9967	5.32
3	113	30.8033	26.1167	27.2933	22.15	12.1867	17.6567	3.45
3	180	102.623	48.1567	32.0433	168.33	97.1933	57.1333	4.19
4	113	32.59	26.6233	26.8367	24.5067	17.4733	18.0133	4.01
4	177	56.7367	44.8633	39.3633	92.02	89.7967	30.3667	5.72
4	50	30.46	23.85	26.1967	25.74	17.41	20.1867	4.72
4	90	26.6367	27.2533	25.5967	29.3167	13.31	15.07	3.06
4	120	47.5333	35.3233	25.6	61.13	49.4033	23.9667	4.1
5	50	30.1167	29.9067	29.9067	26.8267	12.0533	12.7533	3.76
5	113	44.8233	35.81	37.79	32.9567	26.1	27.5433	5.79
5	43	15.9233	23.9933	14.4333	11.3467	10.29	15.2167	2.82
5	123	33.2167	29.9067	27.01	41.2533	28.8067	23.0333	4.1
6	60	30.1833	26.9	35.8133	36.6767	21.24	26.1267	5.42
6	113	29.3967	20.5467	21.91	34.53	20.6533	31.0311	3.82

## Sheet: Means transponiert
TierNo	Alter	Surface	Direction	Mean
1	alt	glass	Pull-off	28.94
1	alt	1µm	Pull-off	28.9433
1	alt	12µm	Pull-off	24.5933
1	alt	glass	Traction	21.8333
1	alt	1µm	Traction	14.7967
1	alt	12µm	Traction	14.44
2	alt	glass	Pull-off	29.76
2	alt	1µm	Pull-off	22.7233
2	alt	12µm	Pull-off	33.37
2	alt	glass	Traction	44.9667
2	alt	1µm	Traction	5.41667
2	alt	12µm	Traction	7.51
3	alt	glass	Pull-off	32.8767
3	alt	1µm	Pull-off	29.77
3	alt	12µm	Pull-off	29.98
3	alt	glass	Traction	40.74
3	alt	1µm	Traction	6.80333
3	alt	12µm	Traction	6.59333
4	alt	glass	Pull-off	70.33
4	alt	1µm	Pull-off	38.05
4	alt	12µm	Pull-off	39.5
4	alt	glass	Traction	46.5333
4	alt	1µm	Traction	6.18333
4	alt	12µm	Traction	31.0167
5	alt	glass	Pull-off	61.4333
5	alt	1µm	Pull-off	47.9833
5	alt	12µm	Pull-off	32.8733
5	alt	glass	Traction	62.6733
5	alt	1µm	Traction	11.9767
5	alt	12µm	Traction	27.9767
6	alt	glass	Pull-off	76.31
6	alt	1µm	Pull-off	28.9333
6	alt	12µm	Pull-off	33.39
6	alt	glass	Traction	37.9767
6	alt	1µm	Traction	12.87
6	alt	12µm	Traction	16.68
7	alt	glass	Pull-off	31.98
7	alt	1µm	Pull-off	24.7133
7	alt	12µm	Pull-off	28.93
7	alt	glass	Traction	50.0967
7	alt	1µm	Traction	16.29
7	alt	12µm	Traction	22.15
8	alt	glass	Pull-off	81.64
8	alt	1µm	Pull-off	36.6833
8	alt	12µm	Pull-off	25.5467
8	alt	glass	Traction	48.6067
8	alt	1µm	Traction	34.9233
8	alt	12µm	Traction	33.1667
9	alt	glass	Pull-off	28.21
9	alt	1µm	Pull-off	20.62
9	alt	12µm	Pull-off	26.17
9	alt	glass	Traction	24.2
9	alt	1µm	Traction	16.5833
9	alt	12µm	Traction	18.92
10	alt	glass	Pull-off	79.1233
10	alt	1µm	Pull-off	44.3133
10	alt	12µm	Pull-off	36.17
10	alt	glass	Traction	60.98
10	alt	1µm	Traction	36.8867
10	alt	12µm	Traction	33.1467
11	alt	glass	Pull-off	58.2133
11	alt	1µm	Pull-off	36.41
11	alt	12µm	Pull-off	33.7633
11	alt	glass	Traction	38.59
11	alt	1µm	Traction	36.51
11	alt	12µm	Traction	30.5967
12	alt	glass	Pull-off	73.6967
12	alt	1µm	Pull-off	48.4267
12	alt	12µm	Pull-off	38.1167
12	alt	glass	Traction	64.19
12	alt	1µm	Traction	56.22
12	alt	12µm	Traction	31.2933
13	alt	glass	Pull-off	32.7233
13	alt	1µm	Pull-off	32.7233
13	alt	12µm	Pull-off	32.4867
13	alt	glass	Traction	19.4467
13	alt	1µm	Traction	21.01
13	alt	12µm	Traction	21.5967
14	alt	glass	Pull-off	29.97
14	alt	1µm	Pull-off	35.7933
14	alt	12µm	Pull-off	34.8233
14	alt	glass	Traction	34.08
14	alt	1µm	Traction	26.2367
14	alt	12µm	Traction	23.42
15	alt	glass	Pull-off	40.4
15	alt	1µm	Pull-off	35.3067
15	alt	12µm	Pull-off	37.25
15	alt	glass	Traction	51.9967
15	alt	1µm	Traction	19.54
15	alt	12µm	Traction	25.4333
1	jung	glass	Pull-off	148.243
1	jung	1µm	Pull-off	83.5633
1	jung	12µm	Pull-off	71.3067
1	jung	glass	Traction	127.133
1	jung	1µm	Traction	56.3267
1	jung	12µm	Traction	59.7333
2	jung	glass	Pull-off	95.5867
2	jung	1µm	Pull-off	72.8967
2	jung	12µm	Pull-off	51.1033
2	jung	glass	Traction	65.4067
2	jung	1µm	Traction	71.3067
2	jung	12µm	Traction	40.8967
3	jung	glass	Pull-off	103.863
3	jung	1µm	Pull-off	77.83
3	jung	12µm	Pull-off	47.1133
3	jung	glass	Traction	94.2533
3	jung	1µm	Traction	70.6333
3	jung	12µm	Traction	44.4333
4	jung	glass	Pull-off	96.23
4	jung	1µm	Pull-off	70.6933
4	jung	12µm	Pull-off	49.1467
4	jung	glass	Traction	87.2967
4	jung	1µm	Traction	62.86
4	jung	12µm	Traction	60.6367
5	jung	glass	Pull-off	107.85
5	jung	1µm	Pull-off	81.65
5	jung	12µm	Pull-off	57.1433
5	jung	glass	Traction	104.427
5	jung	1µm	Traction	85.33
5	jung	12µm	Traction	70.86
6	jung	glass	Pull-off	125.92
6	jung	1µm	Pull-off	71.2267
6	jung	12µm	Pull-off	60.3233
6	jung	glass	Traction	100.907
6	jung	1µm	Traction	77.87
6	jung	12µm	Traction	72.7433
7	jung	glass	Pull-off	140.403
7	jung	1µm	Pull-off	76.88
7	jung	12µm	Pull-off	53.0833
7	jung	glass	Traction	136.4
7	jung	1µm	Traction	74.3167
7	jung	12µm	Traction	84.3367
8	jung	glass	Pull-off	148.817
8	jung	1µm	Pull-off	79.07
8	jung	12µm	Pull-off	49.3233
8	jung	glass	Traction	140.8
8	jung	1µm	Traction	90.67
8	jung	12µm	Traction	68.8633
9	jung	glass	Pull-off	130.083
9	jung	1µm	Pull-off	64.42
9	jung	12µm	Pull-off	51.0567
9	jung	glass	Traction	97.4567
9	jung	1µm	Traction	92.57
9	jung	12µm	Traction	63.2567
10	jung	glass	Pull-off	110.893
10	jung	1µm	Pull-off	46.8733
10	jung	12µm	Pull-off	44.7633
10	jung	glass	Traction	175.687
10	jung	1µm	Traction	91.33
10	jung	12µm	Traction	58.7
11	jung	glass	Pull-off	175.383
11	jung	1µm	Pull-off	87.4433
11	jung	12µm	Pull-off	72.2
11	jung	glass	Traction	158.463
11	jung	1µm	Traction	95.97
11	jung	12µm	Traction	80.3933
12	jung	glass	Pull-off	112.727
12	jung	1µm	Pull-off	69.1533
12	jung	12µm	Pull-off	51.4633
12	jung	glass	Traction	120.813
12	jung	1µm	Traction	87.6433
12	jung	12µm	Traction	56.49
13	jung	glass	Pull-off	127.48
13	jung	1µm	Pull-off	102.513
13	jung	12µm	Pull-off	65.9733
13	jung	glass	Traction	126.953
13	jung	1µm	Traction	91.2067
13	jung	12µm	Traction	85.6933
14	jung	glass	Pull-off	135.203
14	jung	1µm	Pull-off	90.1767
14	jung	12µm	Pull-off	47.7333
14	jung	glass	Traction	203.107
14	jung	1µm	Traction	116.613
14	jung	12µm	Traction	93.0833
15	jung	glass	Pull-off	107.063
15	jung	1µm	Pull-off	57.8133
15	jung	12µm	Pull-off	51.0133
15	jung	glass	Traction	95.6167
15	jung	1µm	Traction	71.0933
15	jung	12µm	Traction	61.6467
1	valt	glass	Pull-off	46.4867
1	valt	1µm	Pull-off	27.9233
1	valt	12µm	Pull-off	25.3833
1	valt	glass	Traction	55.4133
1	valt	1µm	Traction	38.7267
1	valt	12µm	Traction	33.3233
2	valt	glass	Pull-off	56.75
2	valt	1µm	Pull-off	25.8333
2	valt	12µm	Pull-off	25.2767
2	valt	glass	Traction	47.0733
2	valt	1µm	Traction	24.3267
2	valt	12µm	Traction	23.02
